# Supplementary material for: Thymosin Beta4 Regulates Cardiac Valve Formation Via Endothelial-Mesenchymal Transformation in Zebrafish Embryos
Source: PubMed Central journal article supplement — Mol Cells. 2014 Apr 8;37(4):330–6. doi: 10.14348/molcells.2014.0003 (PMC4012082; doi:10.14348/molcells.2014.0003), 2014-04-08

Supplementary Figure 1. Expression pattern of thymosin family 1, 2, 10 in developing zebrafish embryos (A) Whole mount *in situ* hybridization of TB1 was performed as described in Material and Methods. TB1 was not expressed in zebrafish embryos. (B) TB2 was ubiquitously expressed in the developing brain. a-j, lateral view of embryos at each development stage; a'-j', dorsal view at each development stage. FB, forebrain; MB, midbrain; HB, hindbrain; TC, telencephalon; TG, trigeminal ganglion. (C) Expression of TB10 from 20 to 72 hpf.

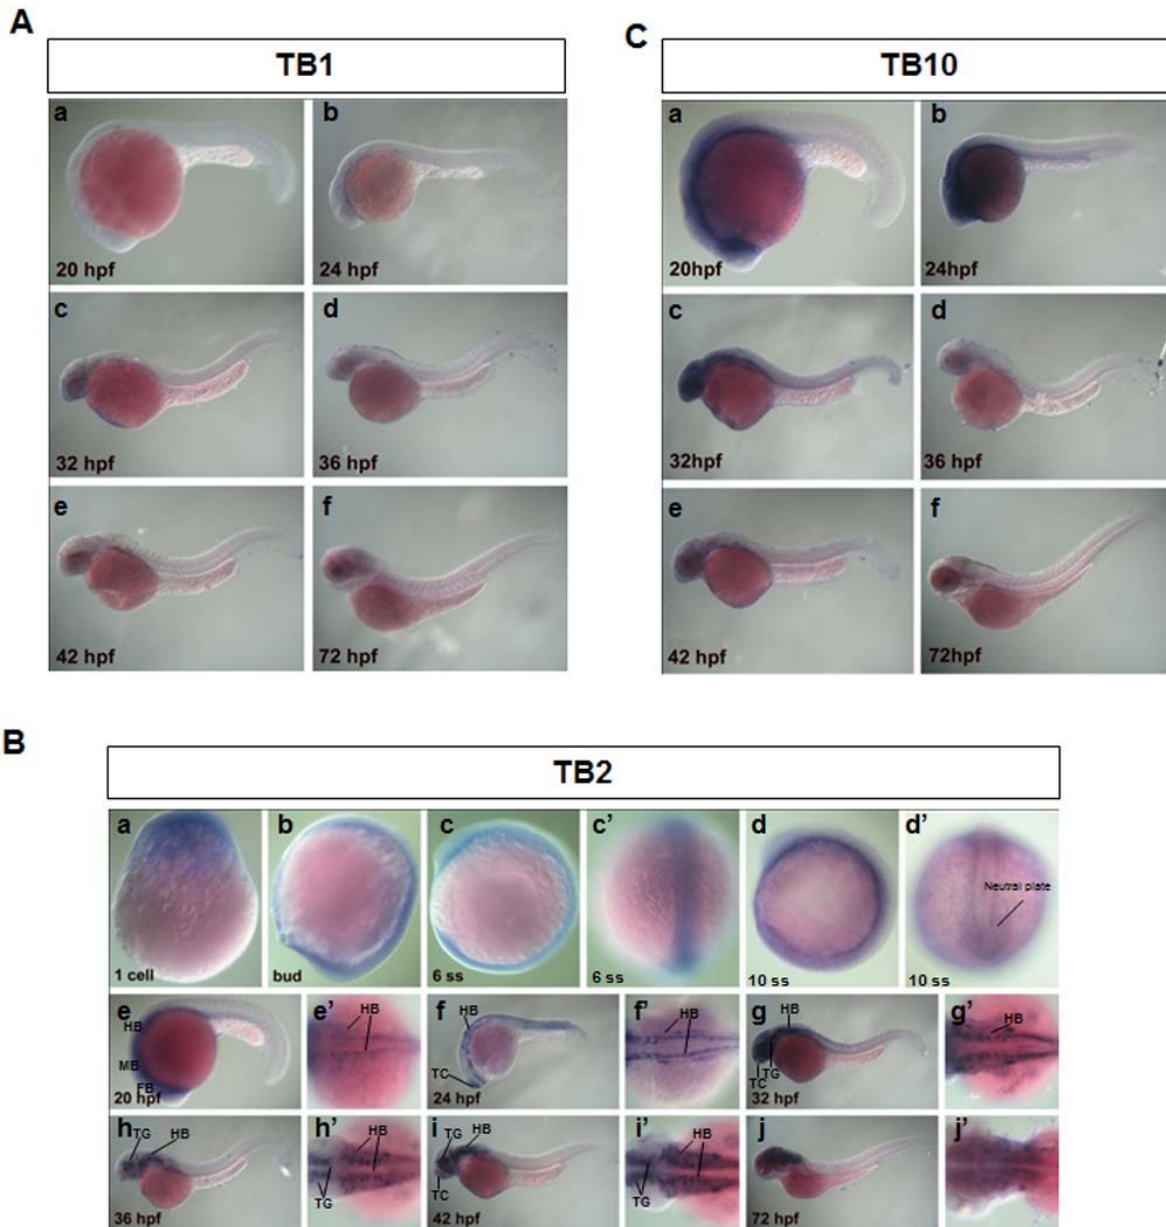

Supplementary Figure 2. Morphological defects in TB4 morphants at 48 hpf (A) Lateral view of phenotypic defects in TB4 morphants; type I heart defect, type II heart and tail defects, and type III more severe heart and tail defects. (B) Graphical summary of phenotype percentage of 177 morphant embryos. (Type I: 31 %, Type II: 19%, Type III: 11 %, normal embryos: 13 % and dead embryos: 24 %).

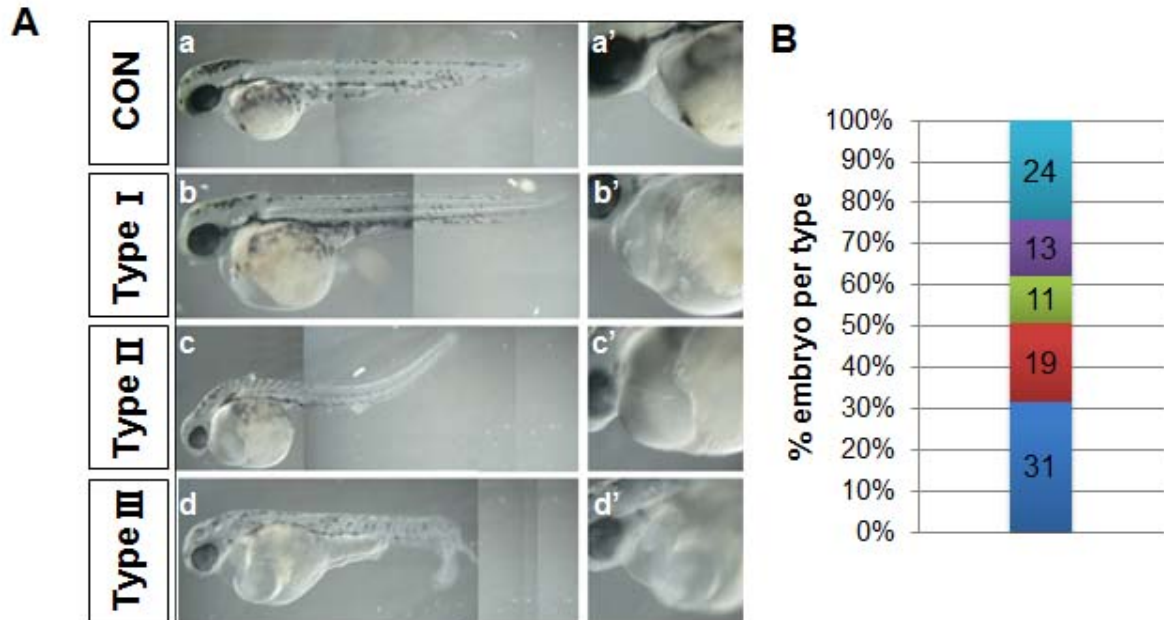

Supplement: molcell-37-4-330-8-supplementary.pdf [file molcell-37-4-330-8-supplementary.pdf]
